# Supplementary material for: Circadian disruption through light-dark cycle alteration induced Alzheimer's disease-like pathology in mice
Source: Research Square preprint supplement (doi:10.21203/rs.3.rs-6773012/v1), 2025-06-10
Supplement: Supplementary file 1 [file 56c40941ac73c3b2997a86ad.docx]

**Supporting information**

**Circadian disruption through light-dark cycle alteration induced Alzheimer's disease-like pathology in mice**

#Guojie Zhao1,2|#Bo Cui1|Yue Lu1|Kefeng Ma1| Xiujie Gao1| Xiaojun She1| Yingwen Zhu1|Xiang Ji1 |*Ying Wang2 |*Honglian Yang1|

1 Military Medical Sciences Academy, Tianjin, 300050, China

2 School of Public Health, Jinzhou Medical University, Jinzhou, Liaoning 121001, China

#Co-first author: Guojie Zhao and Bo Cui

*Corresponding author: wangying6108@163.com, yanghl16@126.com

**Methods**

**1. Quantitative real-time polymerase chain reaction (qRT-PCR)**

According to manufacturer's instructions, total RNA was isolated from the hippocampus using TRIzol reagent (Invitrogen, USA). Commentary DNA (cDNA) was synthesized using PrimeScript™ RT Master Mix kit (Takara, Japan) according to the manufacturer’s protocol. All procedures were conducted on a super-clean bench to ensure sterile conditions. qRT-PCR was performed using specific primers and TB Green Premix Ex Taq (Takara, Japan) on a StepTwo Real-Time PCR System (Applied Biosystems, USA). The thermal cycling conditions were as follows: 95 °C for 30 s; 40 cycles of 95 °C for 5 s; 60 °C for 30 s; followed by 95℃ 10 s. The ΔCt method was used to calculated relative gene expression, and the 2-ΔΔCt method was used for quantitative analysis. Circadian expression profiles (with a continuous monitoring of wavelength of 24 h), were fitted to a cosine curve according to the following equation:

*y = A + [B cos (2π (x-C)/24)*]

where A, B, and C represent the mean (median), amplitude, and top phase, respectively. The peak phase, amplitude, and coefficient of determination (*R2*) were calculated using GraphPad Prism 8 software (GraphPad Software, La Jolla, CA, USA). Amplitude was defined as the ratio of the maximum to minimum average expression levels at different time points. Circadian rhythmicity was considered present if univariate ANOVA indicated significant time effect (*P*<0.05) and if curve fitting yielded *R2*>0.25. If *R2* < 0.25, the fit was considered insufficient to reliably determine amplitude and top phase.

**2. Ultra-high performance liquid chromatography-mass spectrometry metabolomics (UHPLC-MS)**

*Reagents and instruments:*An ultra-high performance liquid chromatography coupled to tandem mass spectrometry system (ExionLC™ AD UHPLC-QTRAP® 6500+, AB SCIEX Corp., Boston, MA, USA) was used. Standards labeled with stable isotopes and neurotransmitter standards were obtained from ZZ Standards Co., LTD., Shanghai, China. Other reagents included ammonium acetate (analytical grade, Sigma-Aldrich, St. Louis, MO, USA), ultrapure water (Millipore, MA, USA), and acetonitrile and formic acid (Optima LC-MS, Thermo-Fisher Scientific, Fair Lawn, NJ, USA).

*Standard solution preparation:*A series of neurotransmitter standard solutions were prepared by diluting neurotransmitter stock solutions with a neurotransmitter-free matrix. L-tyrosine-D4 was used as the internal standard (IS) at a specific concentration. All working solutions were stored at −20 °C until use.

*Metabolites extraction:* A 100 μL aliquot of each sample was pipetted into a tube, and 200 μL of 80% acetonitrile solution containing the mixed IS was added. The mixture was centrifuged at 12,000 rpm for 10 min. Finally, 2 μL of the resultant supernatants were injected into the LC-MS/MS system for analysis.

*LC-MS method:*Neurotransmitter quantification was performed by the UHPLC–MS/MS system. Separation was achieved on a Waters XSelect HSS T3 column (2.1 × 150 mm, 2.5 μm) maintained at 45 °C. The mobile phases were: Solvent A: 0.1% formic acid in 5 mM ammonium acetate and Solvent B: 0.1% formic acid in acetonitrile, delivered at a flow rate of 0.30 mL/min.

The solvent gradient program was as follows: 2 min: 5% B; 4 min: 5–40% B; 7 min: 40–70% B; 7.5 min: 70–100% B; 9 min: 100% B; 9.1 min: 100–5% B; 11 min: 5% B. The mass spectrometer was operated in negative multiple reaction monitoring (MRM) mode with the following parameters: ionspray voltage, −4500 V; curtain gas, 35 psi; ion source temperature, 550 °C; and ion source gases 1 and 2, 60 psi.

**Supplementary Table 1** Primer sequences used for qPCR of circadian genes in mice

| Gene | primers | Sequence（5’— 3’） |
| --- | --- | --- |
| *Bmal1* | Forward | AACCTTCCCGCAGCTAACAG |
| Reverse | AGTCCTCTTTGGGCCACCTT |
| *Clock* | Forward | GGCGTTGTTGATTGGACTAGG |
| Reverse | GAATGGAGTCTCCAACACCCA |
| *Per1* | Forward | CCAGATTGGTGGAGGTTACTGAGT |
| Reverse | GCGAGAGTCTTCTTGGAGCAGTAG |
| *Per2* | Forward | AGAACGCGGATATGTTTGCTG |
| Reverse | ATCTAAGCCGCTGCACACACT |
| *Cry1* | Forward | AGGAGGACAGATCCCAATGGA |
| Reverse | GCAACCTTCTGGATGCCTTCT |
| *Rev-erbα* | Forward | CCCTGGACTCCAATAACAACACA |
| Reverse | GCCATTGGAGCTGTCACTGTAG |
| *Rev-erbβ* | Forward | GGAACGGACCGTCACCTTT |
| Reverse | TCCCCTGCTCCCATTGAGT |
| *Dbp* | Forward | GGAACTGAAGCCTCAACCAATC |
| Reverse | CTCCGGCTCCAGTACTTCTCA |
| *Ciart* | Forward | ACTCAAGATGGGTCGCTTTG |
| Reverse | GGGCAGCTATGTGAGGAAAC |
| GAPDH | Forward | AGGTCGGTGTGAACGGATTTG |
| Reverse | TGTAGACCATGTAGTTGAGGTCA |

**Supplementary Table 2** Circadian characteristics of the cosine fitted profiles of clock gene expression in the hippocampus

|  | Control | | | | CD | | | |
| --- | --- | --- | --- | --- | --- | --- | --- | --- |
| *R2* | *P* | Amplitude | Acrophase | *R2* | *P* | Amplitude | Acrophase |
| *Bmal1* | 0.66 | 0.000 | 0.24 | 22.3 | 0.52 | 0.000 | 0.23 | 16.2 |
| *Clock* | 0.41 | 0.012 | 0.14 | 21.6 | 0.10 | 0.178 | — | — |
| *Per1* | 0.30 | 0.003 | 0.14 | 1.3 | 0.01 | 0.083 | — | — |
| *Per2* | 0.46 | 0.000 | 0.26 | 19.8 | 0.41 | 0.002 | 0.19 | 9.1 |
| *Cry1* | 0.43 | 0.001 | 0.18 | 20.1 | 0.34 | 0.034 | 0.12 | 8.6 |
| *Rev-erbα* | 0.53 | 0.000 | 0.24 | 8.3 | 0.06 | 0.000 | — | — |
| *Rev-erbβ* | 0.29 | 0.007 | 0.13 | 15.4 | 0.16 | 0.295 | — | — |
| *Dbp* | 0.68 | 0.000 | 0.31 | 11.6 | 0.14 | 0.000 | — | — |
| *Ciart* | 0.54 | 0.000 | 0.25 | 11.8 | 0.52 | 0.000 | 0.28 | 2.8 |

Goodness of the fit (*R2*), amplitude, and acrophase of the profiles of all clock genes in the hypothalamus of the mice are summarized. Data for amplitudes and acrophases are only showed at *R2*＞0.25 and *P*＜0.05.

|  | Control | | | | CD | | | |
| --- | --- | --- | --- | --- | --- | --- | --- | --- |
| *R2* | *P* | Amplitude | Acrophase | *R2* | *P* | Amplitude | Acrophase |
| DA | 0.30 | 0.030 | 1.10 | 22.3 | 0.03 | 0.570 | — | — |
| 5-HT | 0.31 | 0.381 | — | — | 0.03 | 0.336 | — | — |
| Ach | 0.26 | 0.046 | 0.41 | 1.3 | 0.09 | 0.651 | — | — |
| Glu | 0.30 | 0.017 | 1.50 | 19.8 | 0.01 | 0.149 | — | — |
| GABA | 0.13 | 0.004 | — | — | 0.02 | 0.025 | — | — |

**Supplementary Table 3** Circadian characteristics of the cosine fitted profiles of neurotransmitter expression in the hippocampus

Goodness of the fit (*R2*), amplitude, and acrophase of the profiles of all neurotransmitter in the hippocampus of the mice are summarized. Data for amplitudes and acrophases are only showed at *R2*＞0.25 and *P*＜0.05.


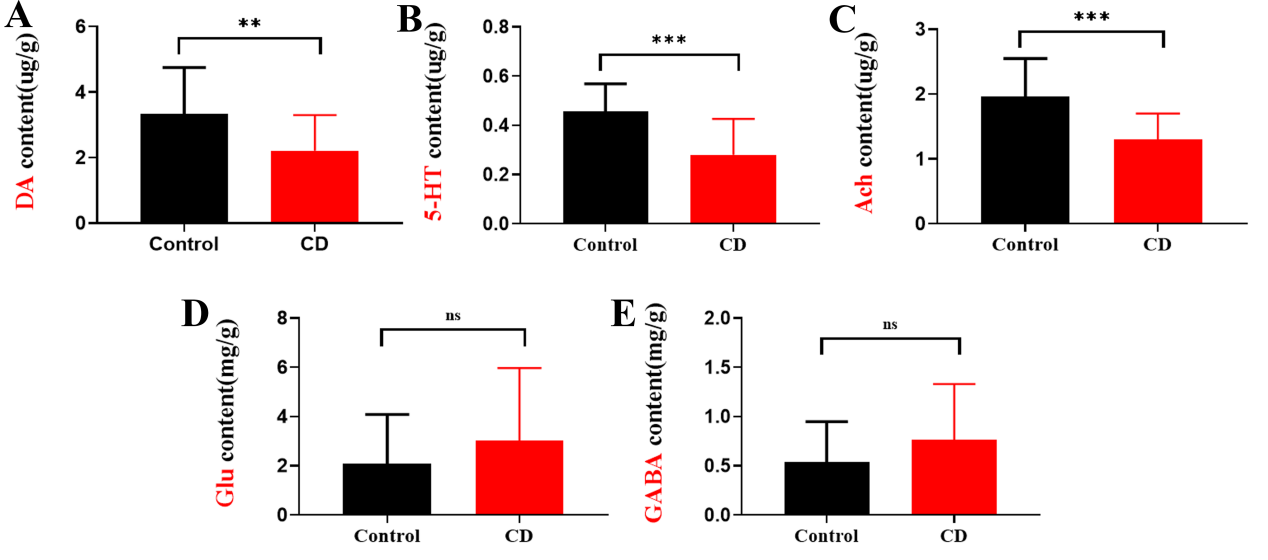


**Supplementary Fig. 1** The expression of major neurotransmitters in the hippocampus. (A-E) The expression level of neurotransmitters was recorded for the *mean* ± *SD*, ***P* < 0.01, ****P* < 0.001 (two-sample *t*-test, n = 36 per group).


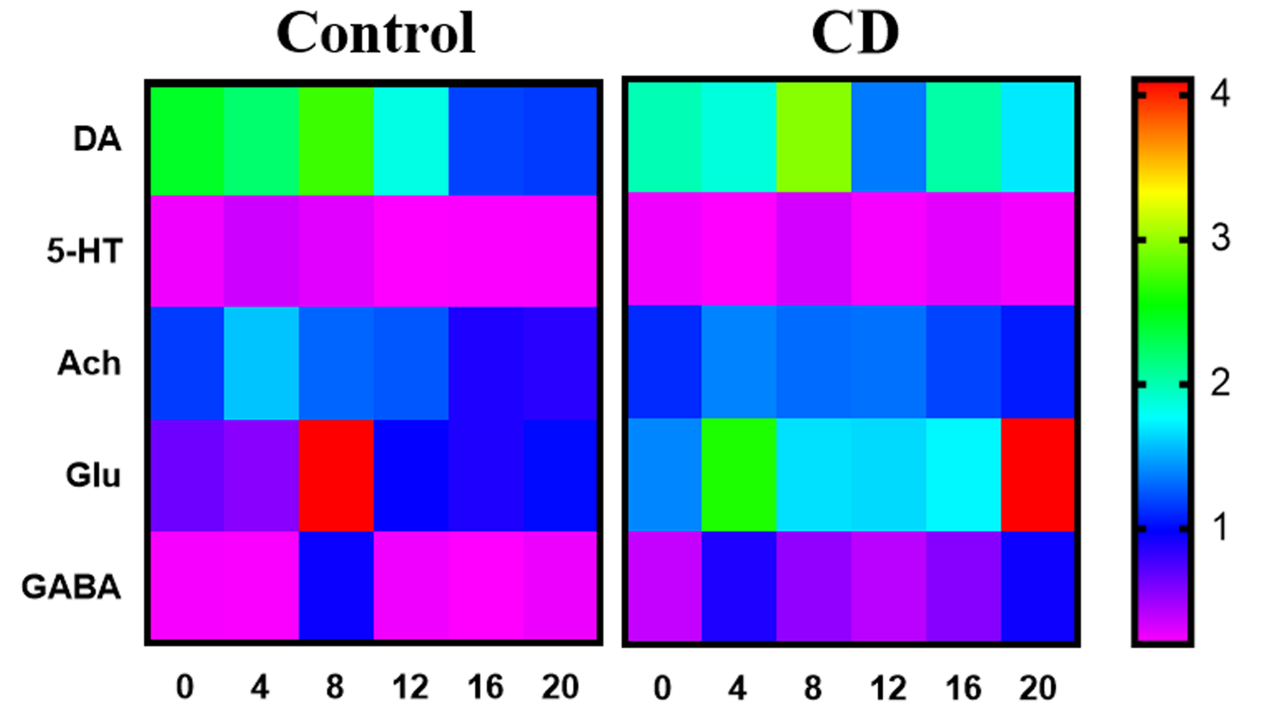


**Supplementary Fig. 2** The expression heat map of major neurotransmitters in the hippocampus. The expression level of neurotransmitters was recorded for the mean ± *SD* of six animals per time point.
